# Supplementary material
Source: publisher figshare collection journal article supplement (https://springernature.figshare.com/ndownloader/files/18353993)
Supplement: Supplementary file 1 [file 18353993]

**Supplementary materials for the paper**  
**RESEARCH OF A COMPLEX FIRE-INDUCED POLLUTION ON THE MARBLE**  
**RELIEF FROM THE PUSHKIN MUSEUM OF FINE ARTS COLLECTION**

*The results of testing different detergent compounds on the marble relief surface*

*“The Flagellation of Christ” from Pushkin Museum of Fine Arts*

Clearing compounds:

1. EDTA (protocol from the paper Julie A. Lauffenburger, Carol A. Grissom and A. Elena Charola. Changes in gloss of marble surfaces as a result of methylcellulose poulticing. *Studies in Conservation* 37 (1992) 155-164)

2. targeted developing mixture SMS-2A\* (alkali)

3. targeted developing mixture SMS-2N\* (neutral).

\*The mixtures were diluted with water in the volume ratio of 1/5.

The protocol of cleaning: all compounds was applied to the surface (yellow square) with a fully soaked cotton swab and held for 6 minutes. Then they removed by dry swab and cleaned by swab with distilled water.

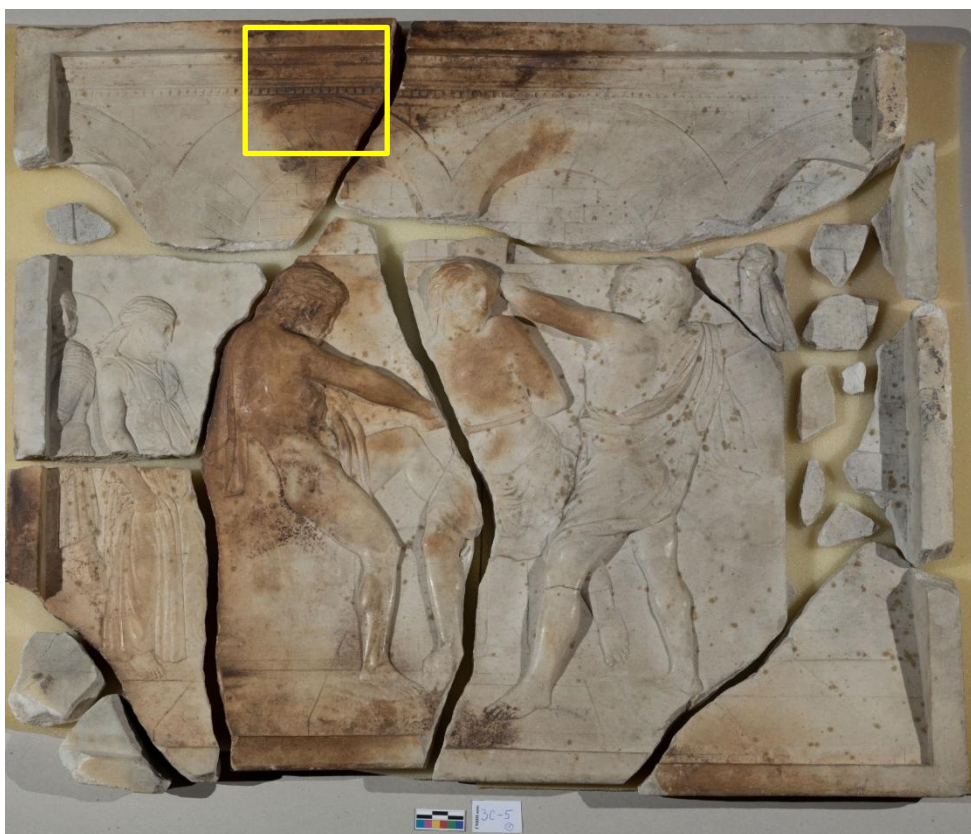

|                                                                                     |  |                                                                                        |
|-------------------------------------------------------------------------------------|--|----------------------------------------------------------------------------------------|
| 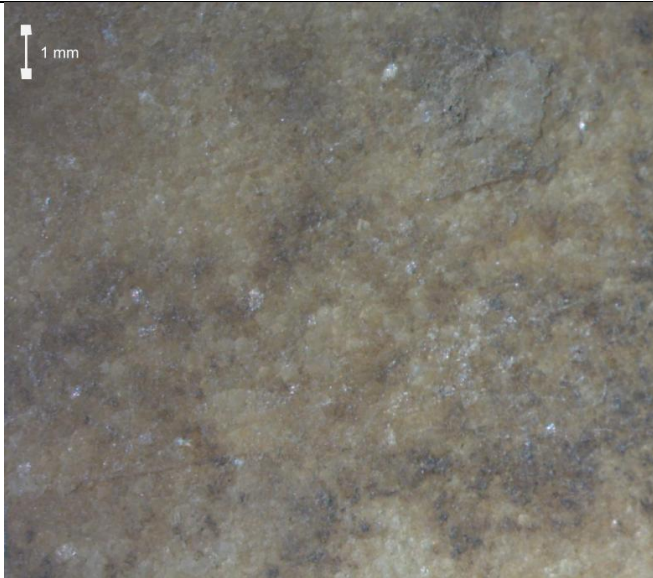   |  | <p>The initial view of marble relief's surface on the tested area before treatment</p> |
|   |  | <p>Application of a alkaline agent SMS-2N</p>                                          |
|  |  | <p>Application of a neutral agent SMS-2A</p>                                           |



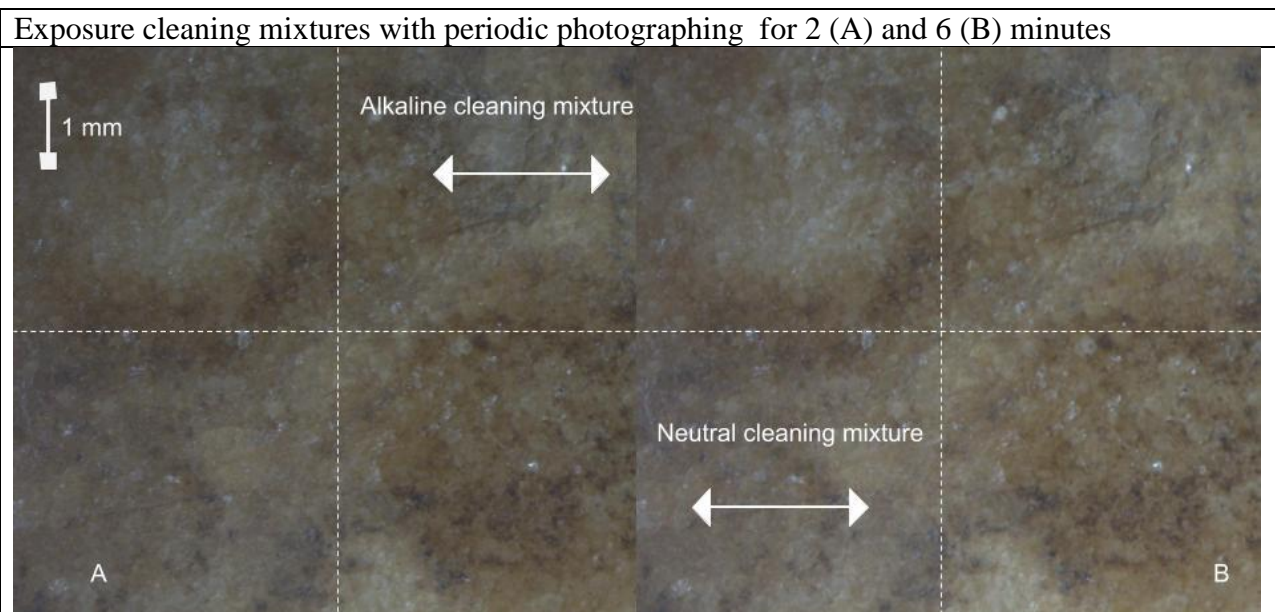

Wash off cleaning mixtures with a cotton swab soaked in distilled water after exposure for 6 minutes

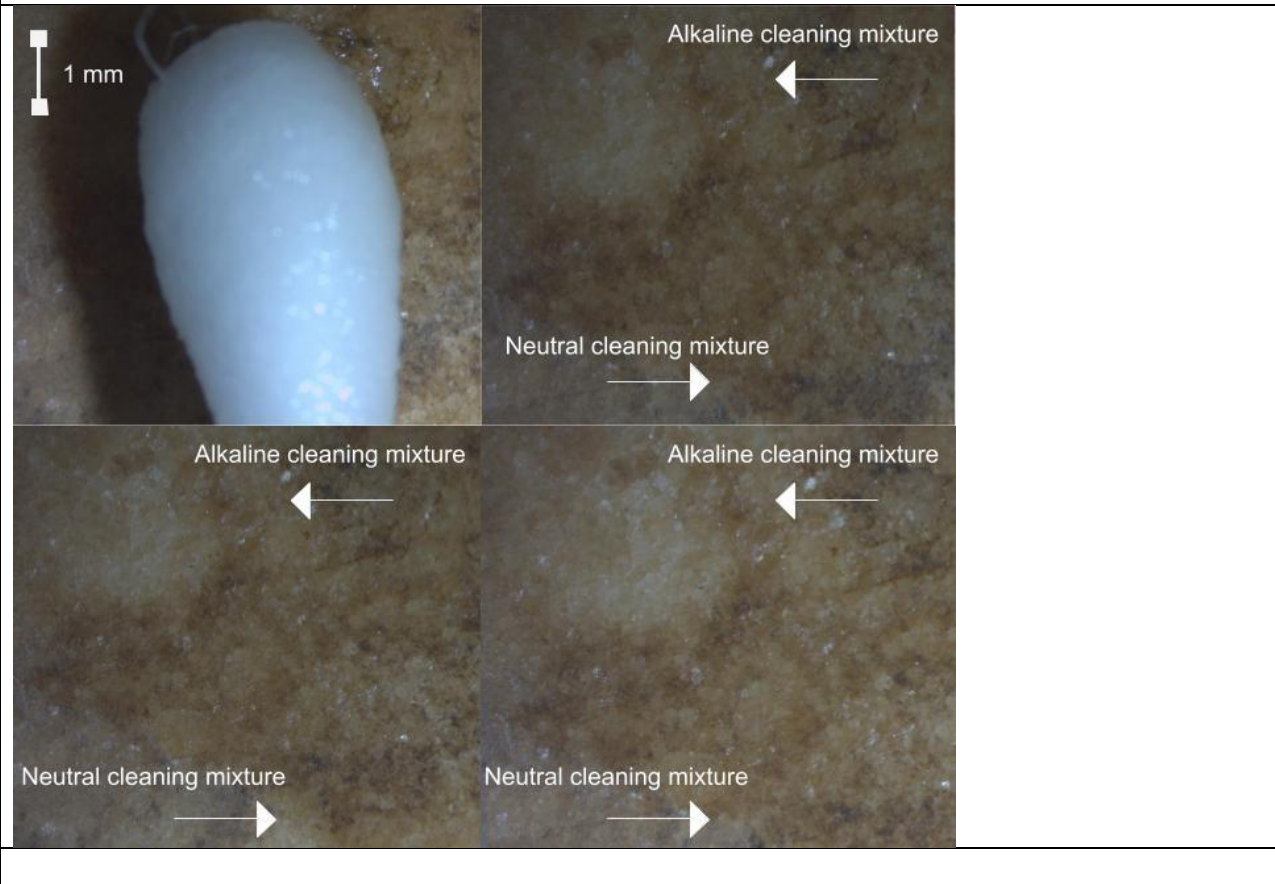

|                                                                                    |  |                                                                                                                                                 |
|------------------------------------------------------------------------------------|--|-------------------------------------------------------------------------------------------------------------------------------------------------|
|   |  | <p>The initial view of marble relief's surface on the tested area before treatment by EDTA (the protocol published in Lauffenburger, 1992).</p> |
|  |  | <p>Application of EDTA based detergent. Time of holding is 6 min.</p>                                                                           |



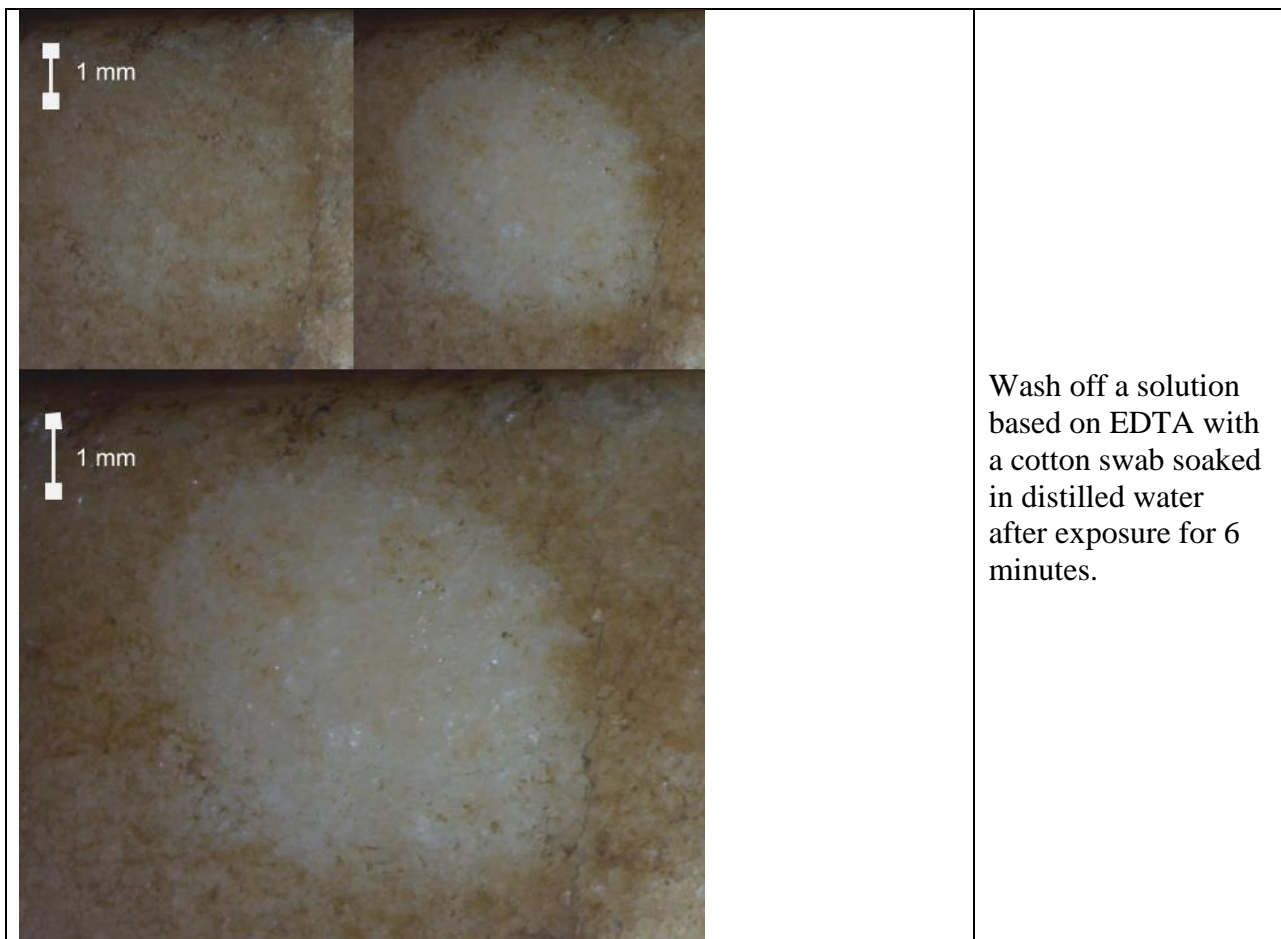

The general view of marble relief. Cleaning by mixture of 4 solvents before studies - isopropanol, cyclohexane, methylene chloride, acetonitrile (1); neutral cleaning mixture SNS-2N (2); and alkaline cleaning mixture SNS-2A (3).

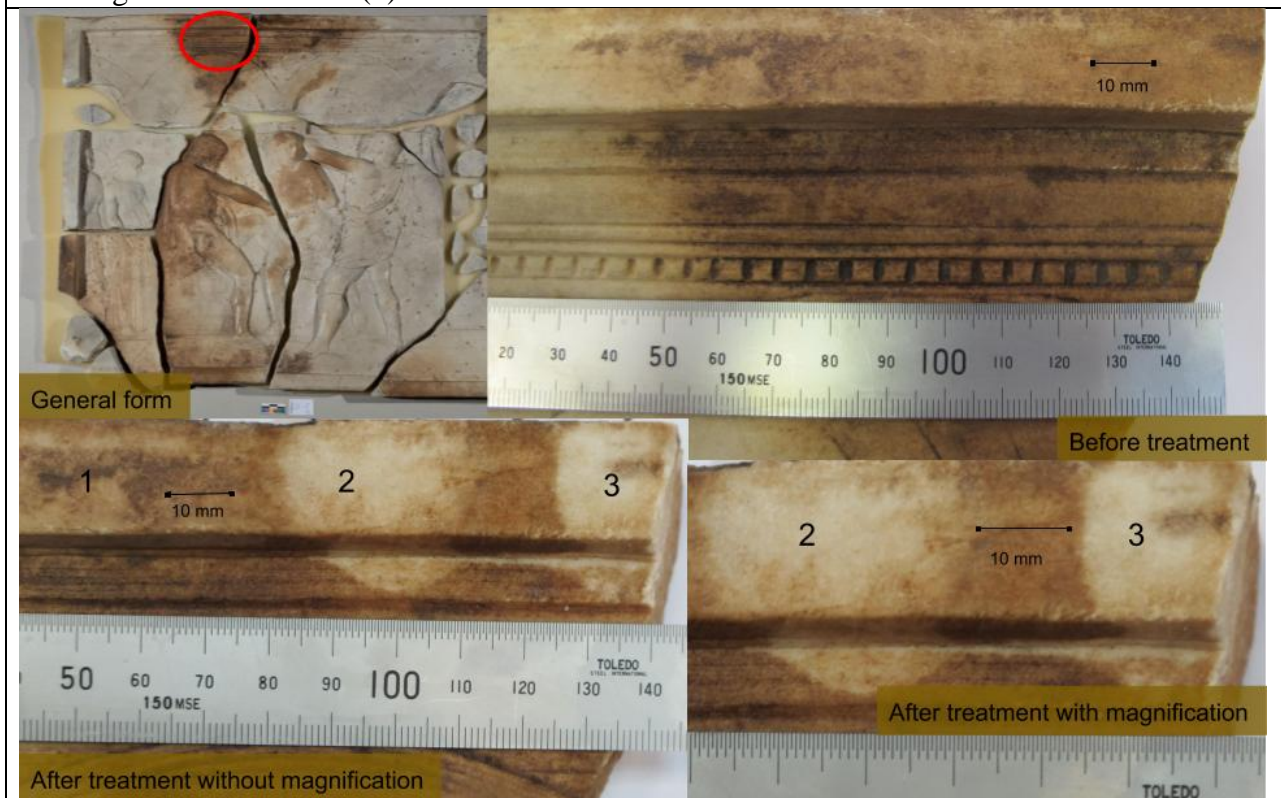

The safety of clearing by EDTA, SMS-2A and SMS-2N was estimate by scanning electron microscopy studies on the surface of test marble samples before and after treatment – see fig.6 in the paper.
